# Supplementary material for: Tractography Insights into Anticipatory Postural Adjustment and Freezing of Gait in Parkinson's Disease
Source: Preprints.org preprint supplement (doi:10.20944/preprints202407.1766.v1), 2024-07-23
Supplement: Supplementary file 1 [file supplementary]

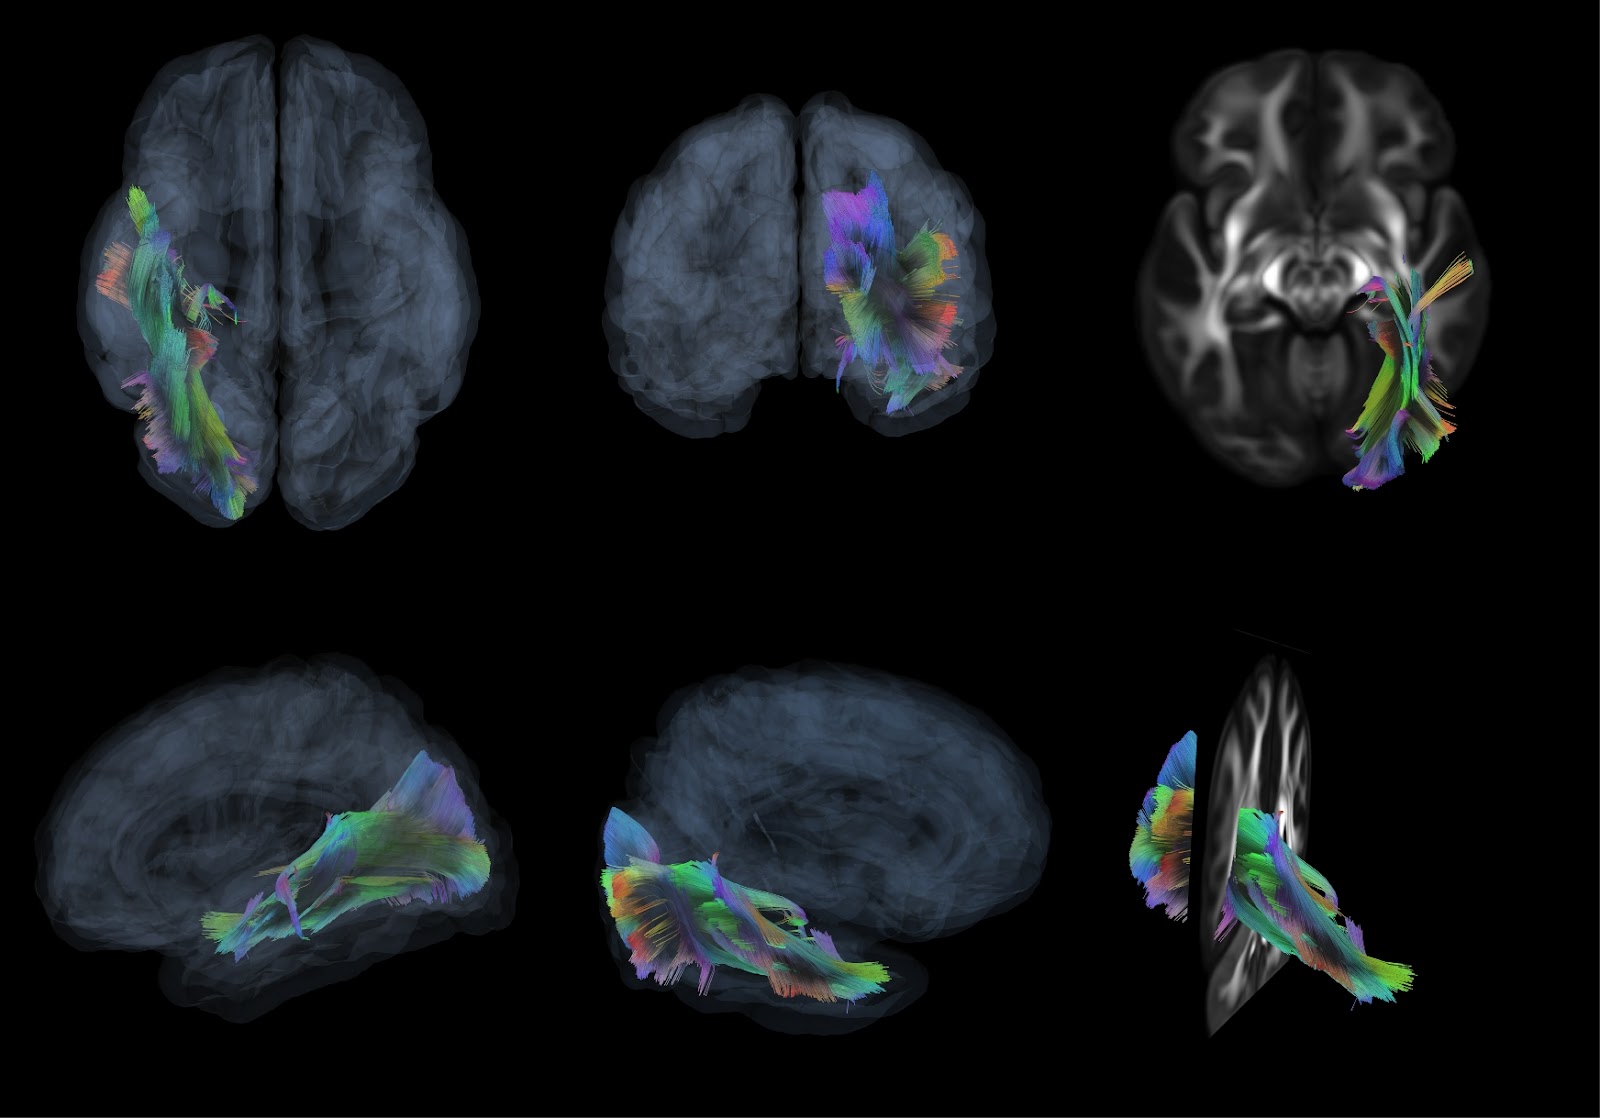


Figure S1 - Diffusion tensor imaging (DTI)-based on the Right Inferior Longitudinal Fasciculus.


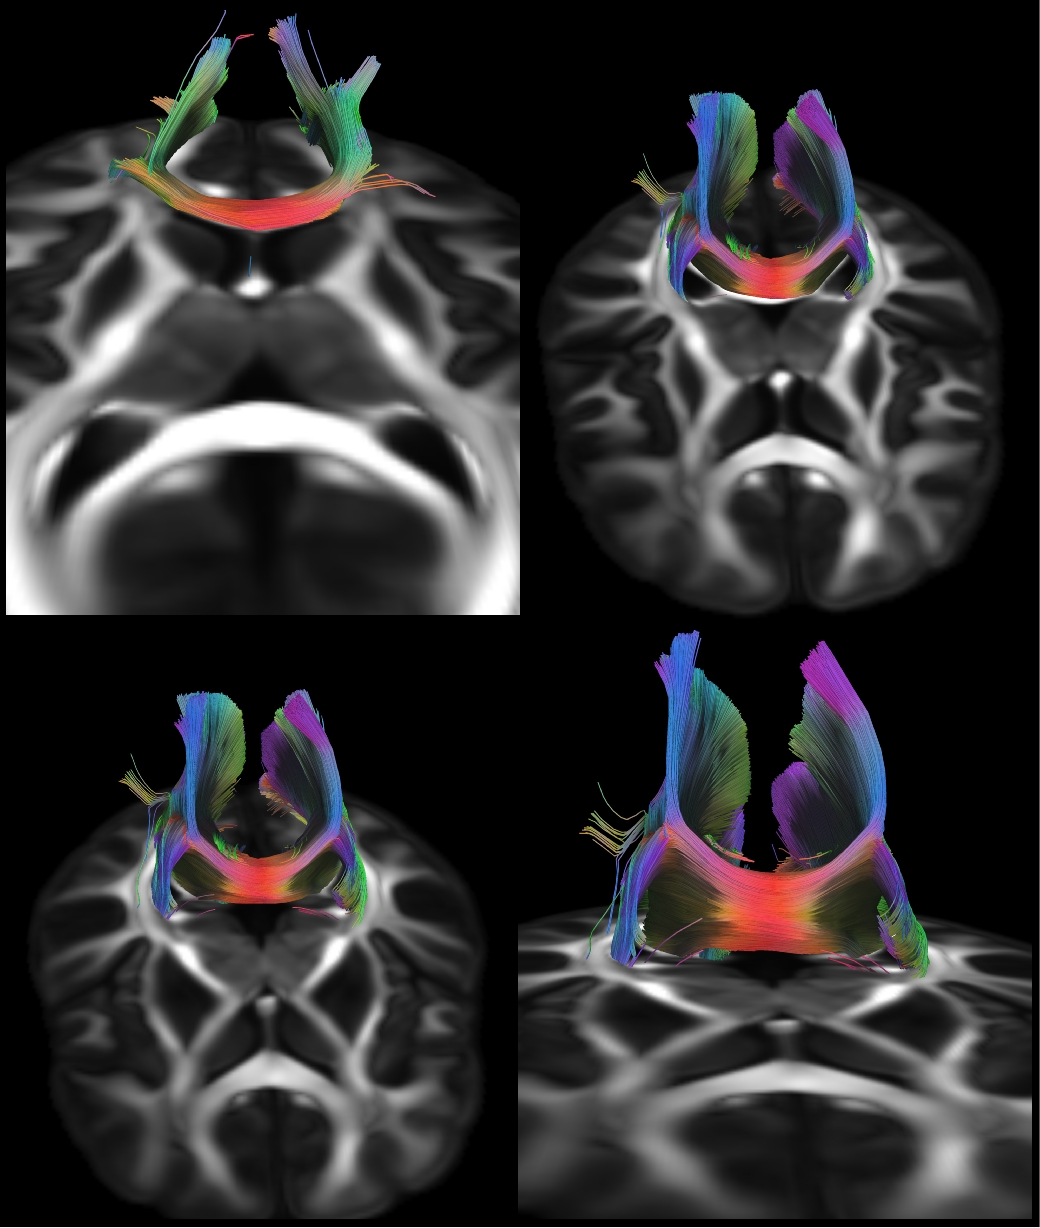


Figure S2 - Diffusion tensor imaging (DTI)-based on the Corpus Callosum Forceps Major.
